1 Lost Opportunity in Tobacco Cessation  
2 Care: The Impact of Underbilling in a  
3 Large Health System  
4

---

5 Derek J Baughman, MD<sup>1</sup>; Marcus Rauhut, MPS<sup>2</sup>; Edward Anselm, MD<sup>3</sup>

- 6 1. Telemedicine Physician, WellSpan Health | Dept. Biomedical Informatics, Vanderbilt University  
7 [derek.j.baughman@vanderbilt.edu](mailto:derek.j.baughman@vanderbilt.edu)  
8 2. Senior Specialist - Research & Development, WellSpan Health  
9 [mrauhut@wellspan.org](mailto:mrauhut@wellspan.org)  
10 3. Assistant Clinical Professor of Medicine, Icahn School of Medicine at Mount Sinai  
11 [eanselm@msn.com](mailto:eanselm@msn.com)

12  
13  
14

15 Manuscript Word count: **2832**

16 Abstract Word count: **238**

17  
18  
19  
20  
21  
22

MeSH: Tobacco, Health Care Economics and Organizations, Primary Health Care, Clinical Coding, Public Health

## Abstract

23  
24  
25  
26  
27  
28  
29  
30  
31  
32  
33  
34  
35  
36  
37  
38  
39  
40  
41  
42  
43  
44  
45

**Introduction:** Tobacco cessation remains a critical challenge in healthcare, with evidence-based interventions often under-utilized due to misaligned economic incentives and inadequate training. This study aims to quantify the economic impact of missed billing opportunities for tobacco cessation in a healthcare system, thereby assessing potential revenue loss and evaluating the effectiveness of systems-based approaches in enhancing tobacco cessation efforts.

**Methods:** A retrospective cohort study utilized aggregated de-identified patient health data from an 8-hospital regional health system across Pennsylvania and Maryland, spanning from 1/1/21 to 12/31/23. The analysis focused on primary care encounters eligible for smoking cessation counseling (CPT codes 99406 or 99407), with potential revenue calculated based on the Medicare reimbursement rate.

**Results:** Among 584,631 primary care patients, 75,115 were identified as smokers. Over three years, only 1,277 of encounters with smokers were billed for cessation services, representing a billing rate of 1.7%. The estimated potential revenue loss from eligible encounters totaled \$5,947,018.13, with an average loss of \$1,982,339.38 annual.

**Conclusions:** The study reveals a significant gap between the potential and actual billing for tobacco cessation services, highlighting not only the financial implications of missed opportunities but the validation of health system’s public health impact. Underbilling contributes to considerable annual revenue loss and undermines primary prevention efforts against tobacco-related diseases. Our findings illuminate the need for enhanced billing practices and systemic changes, including policy improvements that influence proper billing to promote public health benefits through improved smoking cessation interventions.

## Introduction

46  
47  
48  
49  
50  
51  
52  
53  
54  
55  
56  
57  
58  
59  
60  
61  
62  
63  
64  
65  
66  
67

Despite the progress in reducing the prevalence of adult smoking in the United States which is now at 11.5%,<sup>1</sup> there are still over 28.3 million adult cigarette smokers who could benefit from quitting.<sup>2</sup> According to the recent Surgeon General’s Report on Smoking Cessation (2020),<sup>2</sup> 77% of current smokers are interested in quitting, with 55.4% of smokers making a quit attempt in the previous year. Unfortunately, fewer than one-third of smokers attempting to quit utilize evidence-based interventions like FDA-approved cessation medications or behavioral counseling. This shortfall in use of interventions contributes to higher relapse rates, with successful quitters often needing up to 20 attempts in the absence of counseling and medications. Surveys show that from the patient's perspective, physicians are advising patients to quit smoking but not directing them to evidence-based treatment. Each year, the National Committee for Quality Assurance (NCQA) surveys members of every health plan to explore a variety of customer satisfaction measures.<sup>3</sup> NCQA surveys for 2021 reveal that 44% of Commercial HMO members don’t receive counseling on how to quit, and fewer than 40% of patients have discussions about medications. Sadagna et al reported that In a large contemporary US registry, only 1 in 3 smokers presenting for a cardiology visits received smoking cessation assistance.<sup>4</sup> Further, several reports looking at administrative data reveal significant variation and overall underperformance in the provision of tobacco cessation services,<sup>5,6,7</sup> which were attributed to barriers like time constraints and low reimbursement. In a Medicaid claims analysis across 37 states (where an average of 9.4% of smokers attempted to quit within the last year), cessation medication claims ranged from 0.2% to 32.9%, and an average of only 2.7% received cessation counseling (ranging from 0.1% to 5.6%).<sup>7</sup>

68 Advising a smoker to quit is a standard of care which is not usually captured in administrative  
69 data. Counseling smokers for three minutes or ten minutes is a billable service. Clinical practice  
70 guidelines support the delivery of a billable, evidence-based intervention at every clinical  
71 encounter.<sup>8</sup> Much of what is known about clinical performance in tobacco cessation is gleaned  
72 from survey data.<sup>9</sup> Aside from the known challenges with electronic medical records based  
73 claims and reimbursement,<sup>10</sup> the potential revenue lost due to poor service delivery and  
74 ineffective billing practices for cessation services remains underexplored. This gap indicates  
75 missed opportunities in quantifying the economic value of population health applications for  
76 tobacco cessation care.

77 **Study Aim and Objective:** This study aims to evaluate the potential revenue lost in tobacco  
78 cessation care due to inadequate service delivery and billing practices. By using lost revenue as a  
79 proxy, the study intends to measure the potential impact of applying systems-based approaches  
80 in population health for tobacco cessation. The objective is to increase awareness in billing  
81 practices, ultimately enhancing the effectiveness of smoking cessation interventions in  
82 healthcare.

## 83 Methods

### 84 Study Sample

85  
86 In this cohort study, we used aggregated de-identified, patient-level health data to make  
87 population-level estimates of smokers across an 8-hospital health system, WellSpan Health. De-  
88 identified data from over 200 outpatient care locations across Pennsylvania and Maryland were  
89 mined to reveal the total number of primary care encounters eligible for smoking cessation  
90 counseling. Over a three year period, we examined patient's smoking status and whether

91 smoking cessation counseling was billed (CPT codes 99406 or 99407). Inclusion criteria are  
92 summarized in table 1.

### 93 Measures

- 94 1. We used custom data session within Epic’s SlicerDicer similar data capture and analysis across  
95 varying Electronic Medical Record (EMR) systems. The objective of this study was to develop a  
96 framework that could be utilized in future research to analyze clinical data from multiple  
97 EMRs.**Data Mining and Inclusion Criteria:** Primary population filters in Epic’s SlicerDicer  
98 were used to obtain comprehensive patient-level and visit-level data. The timeframe was three  
99 years. Smokers were identified using standard ICD-10 coding based on CMS standards.<sup>12,13</sup>  
100 Adults aged 18 and over, excluding those in hospice care, were identified through structured data  
101 elements indicating smoking status. This identification was derived from medical history records,  
102 active problem lists, or specific tobacco cessation billing codes. We used groupers to include sub-  
103 codes and decimal versions of ICD-10 codes for nicotine dependence (F17.\*), tobacco use  
104 (Z72.0), and tobacco abuse (Z71.6). These details are in Appendix 1.
- 105 2. **Visit Types:** Outpatient and telemedicine visits in the primary care service line were used  
106 exclusively, and data was reported in terms of unique patients and individual visits . Inpatient  
107 encounters, emergency department visits and any visits by hospice patients were excluded.
- 108 3. **Prevalence Assessment:** The prevalence of smoking in our patient cohort, was calculated by  
109 dividing the number of identified smokers by the total population. This calculated prevalence was  
110 then compared to the state health department’s smoking prevalence rates to ensure reliability.<sup>11</sup>
- 111 4. **Billing Rate Computation:** To determine the billing rate, we examined the subset of the smoking  
112 population that was billed for CPT codes 99406 or 99407 during the specified study period. This  
113 data was segmented to differentiate between telemedicine (including audio-only) versus office  
114 encounters. The billing rate for CPT codes 99406/99407 was computed by dividing the number of  
115 patients billed for these codes by the total identified smoking population.

116 5. **Unrealized Potential Revenue Loss Estimation:** To estimate the potential revenue loss, smokers  
117 who were not billed for CPT codes 99406 or 99407 were identified. The reimbursement was  
118 calculated based on insurance type. Medicare reimburses up to 8 cessation attempts in a 12-  
119 month period, and private plans must cover at least two quit attempts per year.<sup>12</sup> The resulting  
120 number was then multiplied by the payer-specified reimbursement rate for the lowest level of  
121 billable CPT codes, providing an estimation of the financial impact associated with unbilled  
122 smoking cessation counseling encounters. The standard Medicare reimbursement rate for the  
123 three-minute counselling cessation, 99406 was used for the calculation. The base rate of \$14.97  
124 was multiplied by 1.4 for commercial insurance and reduced by 70% for Medicaid.<sup>13</sup> Since the  
125 majority of billable visits were for patients with Medicare, Medicaid, and commercial insurance  
126 types, these were reported. Other types of insurance and uninsured patients were removed from  
127 the estimates of missed opportunities.

128 6. **Demographic data:** Data on five demographic variables from patients 18 years and older who  
129 had an office visit or video visit at a primary care office between January 1, 2021, and December  
130 31, 2023 was reported. The data for race and ethnicity were aggregated based on standards set by  
131 the U.S. Department of Health and Human Services and Office of Management and Budget.<sup>14</sup>  
132 The sex of the patient was based on the legal sex documented in the patient’s chart. Age  
133 categories were based on the patient’s age at the time of the visit. Insurance data was based on the  
134 primary payer who covered the visit. Cumulative percentages of age group and insurance type  
135 exceed 100% because patients may have had multiple encounters at different ages or with  
136 different insurance coverage during the study period. After building demographic criteria, we  
137 then grouped patients into segments based on whether they had an office visit or video visit.  
138 Cumulative percentages for visit type exceed 100% because patients may have visits using both  
139 modalities during the study period.

140 The study was exempt from full Institutional Board Review (IRB: HE-2023-101) as the data  
141 mining activity was considered “non-human subjects research” (as defined by DHHS or FDA  
142 regulations, 45 CFR 46.102 and 21 CFR 50.3).

143 The WellSpan Health Institutional Review Board (IRB) waived full ethical review, categorizing  
144 the study as "non-human subjects research" (IRB: HE-2023-101) according to the regulations  
145 established by the Department of Health and Human Services (DHHS) and the Food and Drug  
146 Administration (FDA) under 45 CFR 46.102 and 21 CFR 50.3, respectively.

## 147 Results

148 A total of 584,631 unique patients who met the study inclusion criteria during the three-year sample  
149 period were identified. Demographics (Table 2) revealed a predominately white (83.4%) and non-  
150 Hispanic or Latino (88%) population. More than half (55.5%) were covered by commercial insurance,  
151 while Medicare accounted for 26.5% of patients and Medicaid 15.8%. The remaining 2.2 percent were  
152 uninsured or uncategorized. There was a slightly higher representation of females (54.6%). Patients were  
153 distributed among four age groups, with the majority being older adults (22.1% aged 18-29 years, 26.2%  
154 aged 30-44 years, 34.4% aged 45-64 years, and 26.9% aged 65 years and above). The primary visit  
155 modality was in-office (91.1% of patients had at least one office visit), while 13.6% of patients had at  
156 least one video visit (4.6% had both).

157 We identified 75,115 smokers over the study timeframe, or 12.8% of the patient population (Table 3).  
158 who had 507,656 total primary care visits) which could have received tobacco cessation counseling; To  
159 ensure reliability, we compared this figure with data from the Pennsylvania Department of Health, which  
160 found that 14% of Pennsylvania adults smoke.<sup>11</sup> We found only 1,277 patients, or 1.7% of eligible  
161 patients, received tobacco cessation counseling during the study period. The billing rate was higher  
162 among patients with office visits (1.7%) than telemedicine visits (0.5%). The overall billing rate declined  
163 over the three-year period from 1.4% in 2021 to 1.2% in 2022 and 0.5% in 2023.

164 Over the 3 year timeframe patients with Medicare, Medicaid and commercial insurance had a total of  
165 402,498 eligible visits that were not billed for tobacco cessation counseling (Table 4). Of the eligible  
166 opportunities to provide and bill for tobacco cessation services, 97% appear to have been missed. The  
167 estimated reimbursement potential for this care was \$5,947,018.13 over three years (Table 4).

## 168 Discussion

169 This study found a significant gap between smokers and billed encounters for tobacco cessation  
170 care. Leveraging a large health system's aggregated patient data, the unrealized revenue  
171 highlights two concerns in tobacco cessation care: underbilling (when billable care may have  
172 been rendered), and failure to provide care to eligible patients. The findings reveal a striking  
173 disparity in billing rates and potential revenue opportunity across different modes of care  
174 delivery, notably between telemedicine and office encounters. Given the prevalence of tobacco  
175 use the impact of missed opportunities to help patients quit smoking is profound.  
176 Our reported billing rate—1.7 % overall, is consistent with other studies.<sup>7</sup> In a recent study of an  
177 EMR-enabled smoking treatment program, the pre-intervention baseline was 2.1%.<sup>15</sup> But survey  
178 data supports smokers' affirmation that their doctors are providing tobacco cessation services at  
179 a much higher rate.<sup>16,9</sup> This highlights the importance of improving billing practices, even in  
180 telemedicine, which has become increasingly common and can represent a significant proportion  
181 of the population (13.6% of our study's participants, as shown in table 2). The billing rates for  
182 relevant CPT codes (99406 or 99407) were considerably low, despite the significant portion of  
183 the eligible population that could benefit from cessation interventions,<sup>17</sup> as indicated by the  
184 overall visit-level billing rate of only 0.3% (table 3). Even if we exclude the uninsured and other  
185 unmeasured insurance types, over the three years the potential revenue lost is estimated at  
186 \$5,947,018.13, demonstrating a substantial financial impact This translates to an average



187 \$1,982,339.38 potential revenue loss per year. Moreover, this is potential revenue that is not  
188 reinvested into frontline clinicians and their patients—blunting the impact of primary prevention.  
189 There are many studies exploring the barriers to systemic implementation of tobacco cessation in  
190 detail,<sup>18,19</sup> but none have explored the perspective of reimbursement. The most frequently  
191 reported perceived barriers to providing cessation services were time constraints, high workload,  
192 lack of training, lack of reimbursement of smoking cessation interventions, and the physician's  
193 own smoking status. Low outcome expectancy, lack of self-efficacy, fear of losing patients,  
194 being uncomfortable discussing smoking hazards, and dissatisfaction with professional activity  
195 were also reported.<sup>Error! Bookmark not defined.</sup> Other studies have produced similar results in assessing  
196 effective smoking cessation intervention in primary care<sup>20</sup> and Tobacco Treatment Guideline Use  
197 and Predictors Among U.S. Physicians by Specialty.<sup>21</sup> Our study's results call for a strategic  
198 healthcare policy review by every system, tracking the prevention and screening opportunity  
199 from encounter to outcome and reimbursement. It also underscores the need for AI-driven  
200 clinical billing methods that can navigate the complexities of the US healthcare system and  
201 incentivize preventive services.<sup>22</sup> primary care practices can serve as a pilot model for effective  
202 healthcare delivery by optimizing medical billing and aligning with national quality priorities.  
203 Specifically, the study highlights the necessity of raising awareness among medical providers  
204 and their leadership about the need to adopt systems-based solutions to tobacco cessation with  
205 attention to documentation and billing. Education and advocacy for appropriate reimbursement  
206 policies are vital steps in empowering providers to enhance their intervention efforts.<sup>23</sup> Through  
207 these actions, it is reasonable to presume improvement in smoking cessation interventions,  
208 increased revenue for medical practices, and a reduction in the burden of tobacco-related  
209 diseases.

210 Our study provides valuable insight to providers measuring the potential impact of applying value-  
211 based approaches in population health for tobacco cessation. Ultimately, this research emphasizes the  
212 critical need for systemic changes that not only foster financial efficiency but also prioritize and  
213 effectively deliver public health interventions. Implementing such changes could lead to a  
214 paradigm shift in healthcare delivery, aligning financial incentives with public health goals and  
215 elevating the quality of patient care.

## 216 **Limitations**

217 We acknowledge several limitations of our study. While we provide a general framework for  
218 providers to measure the impact of undelivered tobacco cessation, our results have limited  
219 generalizability to other parts of the country outside the northeast United States as they are from  
220 one health system. A second limitation is that the estimated revenue loss is conservative. In our  
221 study, we only considered primary care encounters. This means we excluded any other outpatient  
222 specialties that might also be offering smoking cessation counseling. Because we filtered our  
223 data by primary care, there may be a greater burden of unrealized potential that we did not  
224 measure.

225 Finally, our study is limited by the wide variation in payer reimbursement, even for the same  
226 CPT codes, along with the cautious estimates we employed when assessing the three payers.  
227 Actual reimbursement varies by region and contract, which should be considered when  
228 interpreting our findings. Some contracts with insurers may be based on capitation and the  
229 services may not be specifically reimbursable. However, the return on investment from smoking  
230 cessation is well established and the rate of reimbursement underestimates the future avoided  
231 medical expense.

232  
233  
234  
235  
236  
237  
238  
239  
240  
241

## Conclusion

This study provides evidence of the untapped potential revenue for conducting tobacco cessation care. The marked discrepancy between eligible and billed cessation services points to either a possible broader trend of underutilizing public health interventions, or a lack of adequate validation in tobacco cessation care delivery. This highlights an opportunity to significantly enhance the financial and health outcomes of frontline tobacco cessation interventions, especially in the primary care setting.

**Table 1. Summary of Eligibility Parameters for Tobacco Cessation Care Billing**

| Criteria                 | Details <sup>a</sup>                                                                                                                                                                                                                                                       |
|--------------------------|----------------------------------------------------------------------------------------------------------------------------------------------------------------------------------------------------------------------------------------------------------------------------|
| Eligible Encounter Codes | Level 2-5 Evaluation and Management (E/M) codes, Qualifying Current Procedural Terminology (CPT) or Healthcare Common Procedure Coding System (HCPCS) codes                                                                                                                |
| Tobacco Product Use      | Use of any tobacco product, including but not limited to cigarettes, cigars, dissolvable, nicotine gels, hookah tobacco, pipe tobacco, roll-your-own tobacco, smokeless tobacco products, vapes, e-cigarettes, hookah pens, and other electronic nicotine delivery systems |
| Exclusion Criteria       | Patients with limited life expectancy, including those receiving hospice services, and any patients with medical reasons that justify not screening for tobacco use or not providing tobacco cessation interventions. <sup>b</sup>                                         |

<sup>a</sup> List of CPT/HCPCS Codes | CMS. Accessed February 6, 2024. <https://www.cms.gov/medicare/regulations-guidance/physician-self-referral/list-cpt/hcpcs-codes>

<sup>b</sup> Explore Measures & Activities. Accessed February 6, 2024. <https://qpp.cms.gov/mips/explore-measures>

Note: Tobacco cessation intervention can be performed by any healthcare provider, not necessarily the same provider who conducted the tobacco use screening.<sup>24</sup>

242  
243  
244  
245  
246  
247  
248  
249  
250  
251  
252  
253  
254  
255  
256  
257  
258

259  
260

**Table 2. Patient Demographics by Visit Type, WellSpan Health (January 1, 2021 to December 31, 2023)**

|                             |                                                                            | <b>Office</b>  | <b>%</b>     | <b>Telemedicine</b> | <b>%</b>     | <b>Total Patients</b> <sup>a</sup> | <b>%</b>      |
|-----------------------------|----------------------------------------------------------------------------|----------------|--------------|---------------------|--------------|------------------------------------|---------------|
| Race                        | White                                                                      | 444,142        | 83.4%        | 67,570              | 85.3%        | 487,617                            | 83.4%         |
|                             | Other                                                                      | 36,957         | 6.9%         | 5,419               | 6.8%         | 40,005                             | 6.8%          |
|                             | Black or African American                                                  | 25,750         | 4.8%         | 3,920               | 4.9%         | 27,724                             | 4.7%          |
|                             | Unknown, declined, or not reported                                         | 18,301         | 3.4%         | 1,394               | 1.8%         | 21,115                             | 3.6%          |
|                             | Asian                                                                      | 6,276          | 1.2%         | 761                 | 1.0%         | 7,059                              | 1.2%          |
|                             | American Indian, Alaska Native, Native Hawaiian and Other Pacific Islander | 1,018          | 0.2%         | 169                 | 0.2%         | 1,111                              | 0.2%          |
| Ethnicity                   | Not Hispanic or Latino                                                     | 469,761        | 88.2%        | 71,716              | 90.5%        | 514,657                            | 88.0%         |
|                             | Hispanic or Latino                                                         | 38,485         | 7.2%         | 5,659               | 7.1%         | 41,633                             | 7.1%          |
|                             | Unknown, declined, or not reported                                         | 24,198         | 4.5%         | 1,858               | 2.3%         | 28,341                             | 4.8%          |
| Legal sex <sup>b</sup>      | Female                                                                     | 292,413        | 54.9%        | 53,592              | 67.6%        | 319,039                            | 54.6%         |
|                             | Male                                                                       | 239,943        | 45.1%        | 25,619              | 32.3%        | 265,498                            | 45.4%         |
| Age <sup>c</sup>            | 18-29y                                                                     | 119,222        | 22.4%        | 18,305              | 23.1%        | 129,076                            | 22.1%         |
|                             | 30-44y                                                                     | 141,613        | 26.6%        | 29,582              | 37.3%        | 153,093                            | 26.2%         |
|                             | 45-64y                                                                     | 182,827        | 34.3%        | 29,394              | 37.1%        | 201,231                            | 34.4%         |
|                             | 65+y                                                                       | 140,836        | 26.5%        | 13,097              | 16.5%        | 157,133                            | 26.9%         |
| Insurance type <sup>d</sup> | Commercial (Highmark, Blue Cross, etc.)                                    | 294,719        | 55.4%        | 48,078              | 60.7%        | 324,457                            | 55.5%         |
|                             | Medicare                                                                   | 140,399        | 26.4%        | 13,900              | 17.5%        | 155,162                            | 26.5%         |
|                             | Medicaid                                                                   | 87,684         | 16.5%        | 16,457              | 20.8%        | 92,285                             | 15.8%         |
|                             | Government/Tricare                                                         | 9,189          | 1.7%         | 1,035               | 1.3%         | 10,042                             | 1.7%          |
|                             | Other                                                                      | 64,605         | 12.1%        | 3,488               | 4.4%         | 125,421                            | 21.5%         |
| <b>Total</b>                |                                                                            | <b>532,444</b> | <b>91.1%</b> | <b>79,233</b>       | <b>13.6%</b> | <b>584,631</b>                     | <b>100.0%</b> |

<sup>a</sup> Cumulative percentages for visit types exceed 100% as patients may have both an office visit and video visit during the study period.

<sup>b</sup> Percentages are calculated based on tallies of patients' legal sex since these values remain consistent over time

<sup>c</sup> Age values can show discrepancies of approximately 5% between cohorts, primarily because some ages are recorded in months and may not be accurately accounted for in the EMR. Additionally, certain ages can change during the measurement time frame, so cumulative percentages exceed 100%.

<sup>d</sup> SlicerDicer can only measure proportions of encounters associated with the financial payer class, making them unavailable for regression analysis. Separating self-pay data from cost-sharing (co-pays and deductibles) can be challenging, resulting in imprecise measurements, as patients can switch payers within the study period. Notably, this challenge can be exacerbated in the blended group, where patients receive both types of care. In the case of Medicare and Medicaid, there might be overlap among patients with both payer types. The key insight from the payer data is the comparable distribution of percentages across exposure groups.

261  
262  
263  
264  
265  
266

267

268 **Table 3. Primary Care Tobacco Cessation Counseling by Year**

269

|          | Category                                             | 2021 (%)       | 2022 (%)       | 2023 (%)       | Total 2021-2023 (%) |
|----------|------------------------------------------------------|----------------|----------------|----------------|---------------------|
| Patients | Total                                                | 405,485        | 380,204        | 375,704        | 584,631             |
|          | Smokers                                              | 43,695 (10.8%) | 44,285 (11.6%) | 42,385 (11.3%) | 75,115 (12.8%)      |
|          | Smokers billed for cessation                         | 622 (1.4%)     | 545 (1.2%)     | 218 (0.5%)     | 1,277 (1.7%)        |
| Visits   | Smokers total primary care encounters                | 169,215        | 172,688        | 165,753        | 507,656             |
|          | Smokers encounters billed for cessation              | 731 (0.4%)     | 596 (0.3%)     | 230 (0.1%)     | 1,557 (0.3%)        |
|          | Encounters with other insurance type or no insurance | 11,889         | 11,067         | 9,631          | 32,587              |
|          | Non-reimbursable encounters*                         | 24,047         | 24,508         | 22,459         | 71,014              |
|          | Unbilled encounters                                  | <b>132,548</b> | <b>136,517</b> | <b>133,433</b> | <b>402,498</b>      |

\* This number reflects visits that exceed the maximum reimbursable visits for our 3 payers of interest. For example, Medicare covers up to 8 cessation attempts per year, so Medicare patients with more than 8 visits in a year will only count as having 8 eligible visits.

270

271 **Table 4: Estimated Reimbursement Based on Payer Type**

272

| Payer              | 2021 Eligible Visits (est. reimbursement) | 2022 Eligible Visits (est. reimbursement) | 2023 Eligible Visits (est. reimbursement) | Total Eligible Visits (est. reimbursement) |
|--------------------|-------------------------------------------|-------------------------------------------|-------------------------------------------|--------------------------------------------|
| Commercial \$20.96 | 35,864 (\$751,637.71)                     | 36,359 (\$762,011.92)                     | 35,471 (\$743,401.22)                     | 107,694 (\$2,257,050.85)                   |
| Medicare \$14.97   | 41,986 (\$628,530.42)                     | 44,995 (\$673,575.15)                     | 46,779 (\$700,281.63)                     | 133,760 (\$2,002,387.20)                   |
| Medicaid \$10.48   | 54,698 (\$573,180.34)                     | 55,163 (\$578,053.08)                     | 51,183 (\$536,346.66)                     | 161,044 (\$1,687,580.08)                   |
| Total              | <b>132,548 (\$1,953,348.47)</b>           | <b>136,517 (\$2,013,640.15)</b>           | <b>133,433 (\$1,980,029.51)</b>           | <b>402,498 (\$5,947,018.13)</b>            |

273

274

275

276

277

278

279

280

281

282

- <sup>1</sup> *Smoking Cessation: A Report of the Surgeon General*. 2020. *Publications and Reports of the Surgeon General*.
- <sup>2</sup> Cornelius ME, Loretan CG, Jamal A, et al. Tobacco Product Use Among Adults - United States, 2021. *MMWR Morb Mortal Wkly Rep*. May 5 2023;72(18):475-483. doi:10.15585/mmwr.mm7218a1
- <sup>3</sup> NCQA. Medical Assistance with Smoking and Tobacco Use Cessation. Accessed 5/15/2023, 2023. <https://www.ncqa.org/hedis/measures/medical-assistance-with-smoking-and-tobacco-use-cessation/>
- <sup>4</sup> Sardana M, Tang Y, Magnani JW, et al. Provider-Level Variation in Smoking Cessation Assistance Provided in the Cardiology Clinics: Insights From the NCDR PINNACLE Registry. *J Am Heart Assoc*. Jul 2 2019;8(13):e011412. doi:10.1161/JAHA.118.011307
- <sup>5</sup> Hoel AW, Nolan BW, Goodney PP, et al. Variation in smoking cessation after vascular operations. *J Vasc Surg*. May 2013;57(5):1338-44; quiz 1344 e1-4. doi:10.1016/j.jvs.2012.10.130
- <sup>6</sup> Goldstein MG, DePue JD, Monroe AD, et al. A population-based survey of physician smoking cessation counseling practices. *Prev Med*. Sep-Oct 1998;27(5 Pt 1):720-9. doi:10.1006/pmed.1998.0350
- <sup>7</sup> Wang X, Babb S, Xu X, Ku L, Glover-Kudon R, Armour BS. Receipt of cessation treatments among Medicaid enrollees trying to quit smoking. *Nicotine and Tobacco Research*. 2021;23(6):1074-1078.
- <sup>8</sup> Michael C. Fiore, Douglas E. Jorenby, Timothy B. Baker, Smoking cessation: Principles and practice based upon the AHCPR Guideline, 1996, *Annals of Behavioral Medicine*, Volume 19, Issue 3, September 1997, Pages 213–219, <https://doi.org/10.1007/BF02892286>
- <sup>9</sup> United States Public Health Service Office of the Surgeon General; National Center for Chronic Disease Prevention and Health Promotion (US) Office on Smoking and Health. *Smoking Cessation: A Report of the Surgeon General*. Washington (DC): US Department of Health and Human Services; 2020.
- <sup>10</sup> McCullough JM. Timing of Clinical Billing Reimbursement for a Local Health Department. *Public Health Rep*. 2016;131(2):283-289. doi:10.1177/003335491613100212
- <sup>11</sup> PA Department of Health. Pennsylvania Tobacco Data. Department of Health. Accessed December 8, 2023. <https://www.health.pa.gov:443/topics/programs/tobacco/Pages/Data.aspx>
- <sup>12</sup> Billing Guide for Tobacco Screening and Cessation. <https://www.lung.org/getmedia/08ed3536-6bab-48a6-a4e4-e6dbccaea024/billing-guide-for-tobacco-1.pdf>
- <sup>13</sup> Centers for Medicare & Medicaid Services. Accessed January 1, 2024. <https://www.cms.gov/medicare/physician-fee-schedule/search?Y=0&T=4&HT=1&CT=0&H1=99406&H2=99407&M=5>
- <sup>14</sup> Explanation of data standards for race, ethnicity, sex, primary language, and disability. Office of Minority Health. Accessed December 12, 2023. <https://minorityhealth.hhs.gov/explanation-data-standards-race-ethnicity-sex-primary-language-and-disability>.
- <sup>15</sup> McCarthy DE, Baker TB, Zehner ME, et al. A comprehensive electronic health record-enabled smoking treatment program: Evaluating reach and effectiveness in primary care in a multiple baseline design. *Prev Med*. 2022;165(Pt B):107101. doi:10.1016/j.ypmed.2022.107101
- <sup>16</sup> Medical Assistance with Smoking and Tobacco Use Cessation. NCQA. Accessed January 16, 2024. <https://www.ncqa.org/hedis/measures/medical-assistance-with-smoking-and-tobacco-use-cessation/>
- <sup>17</sup> Stead LF, Buitrago D, Preciado N, Sanchez G, Hartmann-Boyce J, Lancaster T. Physician advice for smoking cessation. *Cochrane Database Syst Rev*. 2013;2013(5):CD000165. Published 2013 May 31. doi:10.1002/14651858.CD000165.pub4
- <sup>18</sup> Adams JM. Smoking Cessation—Progress, Barriers, and New Opportunities: The Surgeon General’s Report on Smoking Cessation. *JAMA*. 2020;323(24):2470–2471. doi:10.1001/jama.2020.6647
- <sup>19</sup> Pipe AL, Evans W, Papadakis S. Smoking cessation: health system challenges and opportunities. *Tob Control*. 2022;31(2):340-347. doi:10.1136/tobaccocontrol-2021-056575

- 
- <sup>20</sup> Kushnir V, Cunningham JA. Assessing effective smoking cessation intervention in primary care. *Preventive Medicine Reports*. 2015;2:181-182. doi:[10.1016/j.pmedr.2015.03.001](https://doi.org/10.1016/j.pmedr.2015.03.001)
- <sup>21</sup> Schaer DA, Singh B, Steinberg MB, Delnevo CD. Tobacco Treatment Guideline Use and Predictors Among U.S. Physicians by Specialty. *American Journal of Preventive Medicine*. 2021;61(6):882-889. doi:[10.1016/j.amepre.2021.05.014](https://doi.org/10.1016/j.amepre.2021.05.014)
- <sup>22</sup> Kilanko V. The Transformative Potential of Artificial Intelligence in Medical Billing: A Global Perspective. 2023;4(3). doi:<https://doi.org/10.51542/ijscia.v4i3.8>
- <sup>23</sup> Burks K, Shields J, Evans J, Plumley J, Gerlach J, Flesher S. A systematic review of outpatient billing practices. *SAGE Open Medicine*. 2022;10:205031212210990. doi:<https://doi.org/10.1177/20503121221099021>
- <sup>24</sup> Preventive Care and Screening: Tobacco Use: Screening and Cessation Intervention | eCQI Resource Center. Accessed December 8, 2023. <https://ecqi.healthit.gov/ecqm/ec/2021/cms138v9#>
